# Supplementary material for: Co-ordination behaviour of a novel tristhiourea tripodal ligand; structural variations in a series of transition metal complexes
Source: Royal Society of Chemistry journal article supplement (doi:10.1039/c6dt01148a), 2016-01-01
Supplement: c6dt01148a1.pdf [file c6dt01148a1.pdf]

## ESI Data

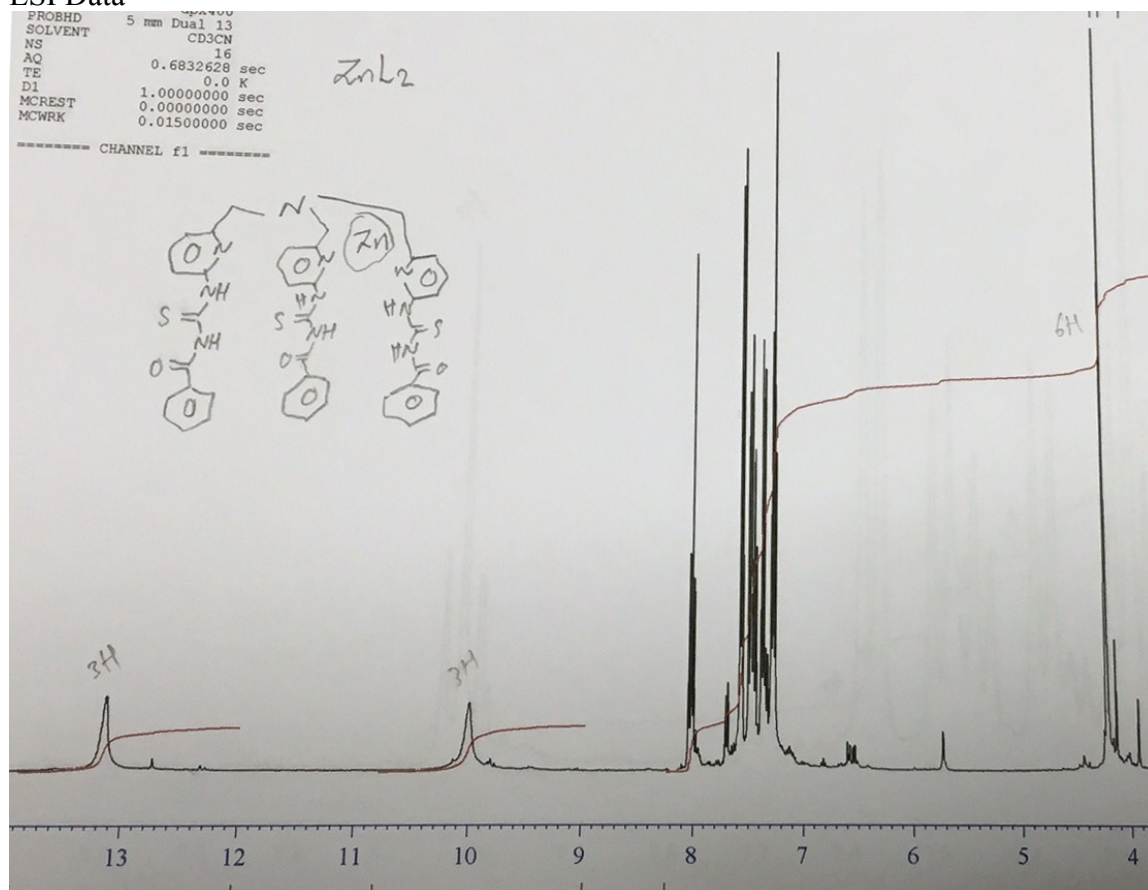

**Figure 1:.**  $^1\text{H}$  NMR Spectrum of  $[\text{ZnL}][\text{ClO}_4]$

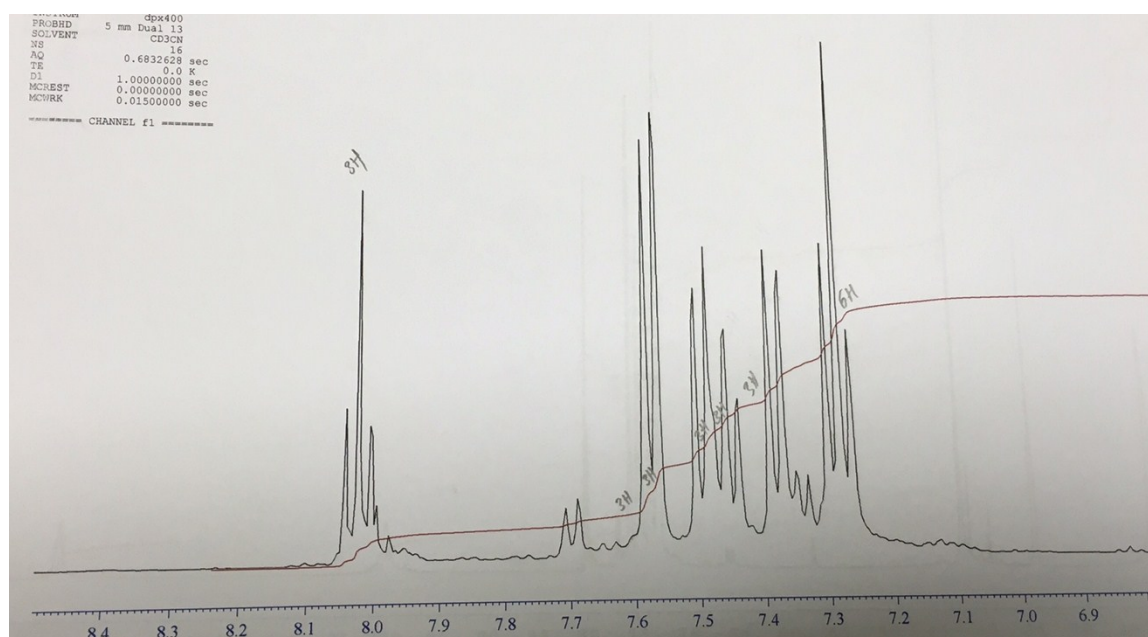

**Figure 2:**  $^1\text{H}$  NMR Spectrum of  $[\text{ZnL}][\text{ClO}_4]_2$  in aromatic region

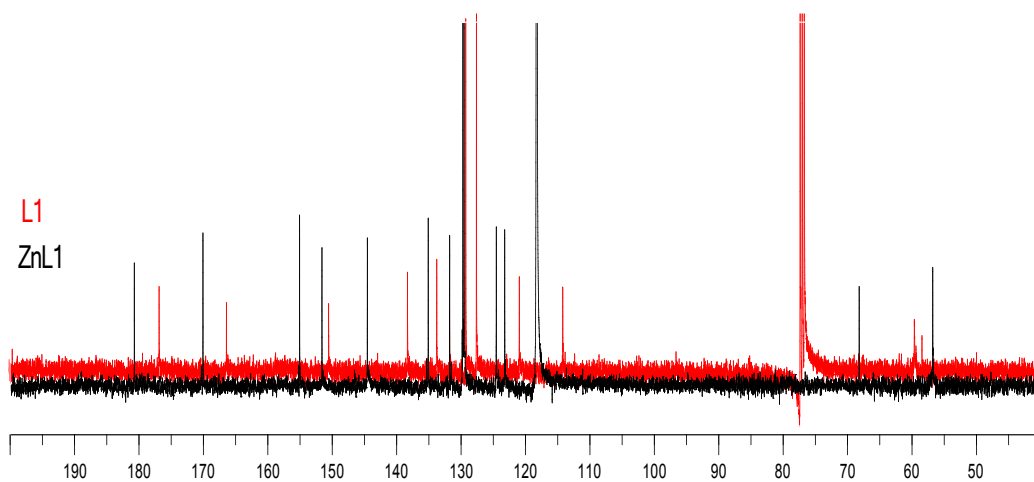

**Figure 3:** Superimposed  $^{13}\text{C}$  NMR spectra of both the  $\text{L}^1$  (red) and zinc complex (black) of  $\text{L}^1$ .
